# Supplementary material for: Understanding the reaction mechanism of the oxidative addition of ammonia by (PXP)Ir(i) complexes: the role of the X group
Source: Royal Society of Chemistry journal article supplement (doi:10.1039/c7cp07453k), 2017-11-30
Supplement: c7cp07453k1.pdf [file c7cp07453k1.pdf]

Supporting information

## **Understanding the Reaction Mechanism of the Oxidative Addition of Ammonia by [(PXP)Ir(I)] Complexes: The role of the X group**

*Julen Munarriz,<sup>†</sup> Ederley Velez,<sup>‡</sup> Miguel A. Casado,<sup>§</sup> Victor Polo<sup>†\*</sup>*

<sup>†</sup> Departamento de Química Física and Instituto de Biocomputación y Física de los Sistemas Complejos (BIFI), Universidad de Zaragoza. Pl. S. Francisco S/N  
50009 Zaragoza, Spain

<sup>‡</sup> Departamento de Ciencias Básicas. Universidad de Medellín, Medellín,  
Colombia

<sup>§</sup> Instituto de Síntesis Química y Catálisis Homogénea (ISQCH)-Departamento de Química Inorgánica, CSIC-Universidad de Zaragoza, Pl. S. Francisco S/N  
50009 Zaragoza, Spain

### **Table of Contents**

- Table S1. Absolute energies.
- Table S2. Integrated ELF basin populations for R, TS and P.
- Figures S1, S2, S3, S4. Integrated electron density for some ELF basins along the calculated IRC path.
- Tables S3, S4, S5, S6. Energetic, geometric and ELF data for each structural stability domain (SSD).
- Figure S5. Geometrical representation of complex 2
- Table S7. List of Cartesian coordinates.

**Table S1.** B3LYP-D3BJ/def2TZVP absolute energetic values for B3LYP-D3BJ/def2SVP optimized structures (metallic fragment, reactant, transition structure and product). Energies in a.u. The lowest vibrational frequency ( $\text{cm}^{-1}$ ) is also presented. We made sure that for transition states there is only one imaginary frequency.

|                 |             | E(TZ)       | Lowest frequency |
|-----------------|-------------|-------------|------------------|
| <b>1</b>        | F           | -1129.22604 | 27.9             |
|                 | (X = B) R   | -1185.83672 | 28.6             |
|                 | TS          | -1185.79304 | -863.8           |
|                 | P           | -1185.85251 | 43.1             |
| <b>2</b>        | F           | -1143.05127 | 33.9             |
|                 | (X = CH) R  | -1199.67333 | 22.3             |
|                 | TS          | -1199.63844 | -1090.4          |
|                 | P           | -1199.68100 | 44.64            |
| <b>3</b>        | F           | -1159.07716 | 35.9             |
|                 | (X = N) R   | -1215.71025 | 29.3             |
|                 | TS          | -1215.68131 | -985.9           |
|                 | P           | -1215.71205 | 45.0             |
| <b>4</b>        | F           | -1179.33806 | 34.6             |
|                 | (X = O) R   | -1236.01354 | 23.7             |
|                 | TS          | -1235.96585 | -920.7           |
|                 | P           | -1236.00523 | 41.6             |
| <b>5</b>        | F           | -1394.50659 | 31.6             |
|                 | (X = SiH) R | -1451.12367 | 21.9             |
|                 | TS          | -1451.08305 | -893.9           |
|                 | P           | -1451.13442 | 39.6             |
| NH <sub>3</sub> |             | -56.58656   | 1062.6           |

**Table 2.** Integrated ELF basins electron populations for the stationary points (R, TS and P) for complexes **1-5**.

| comple              | structur | V(Ir) | V(Ir,X) | V(Ir,N <sub>NH3</sub> ) | V(N,H <sub>1</sub> ) | V(Ir,H <sub>1</sub> ) | V(Ir,P <sub>1</sub> ) | V(Ir,P <sub>2</sub> ) |
|---------------------|----------|-------|---------|-------------------------|----------------------|-----------------------|-----------------------|-----------------------|
| <b>1</b><br>(X = B) | R        | 14.9  | 2.47    | 1.90                    | 1.97                 | -----                 | 2.43                  | 2.44                  |
|                     | TS       | 13.9  | 2.70    | 3.23                    | -----                | 1.52                  | 2.35                  | 2.34                  |
|                     | P        | 14.0  | 2.01    | 3.65                    | -----                | 1.78                  | 2.31                  | 2.31                  |
| <b>2</b><br>(X = N) | R        | 15.6  | 1.64    | 1.88                    | 1.98                 | -----                 | 2.49                  | 2.50                  |
|                     | TS       | 14.7  | 1.67    | 3.27                    | -----                | 1.52                  | 2.40                  | 2.43                  |
|                     | P        | 14.3  | 1.47    | 3.64                    | -----                | 1.77                  | 2.39                  | 2.39                  |
| <b>3</b><br>(X = N) | R        | 15.8  | 1.80    | 1.82                    | 2.00                 | -----                 | 2.40                  | 2.41                  |
|                     | TS       | 14.9  | 1.77    | 3.27                    | -----                | 1.50                  | 2.36                  | 2.36                  |
|                     | P        | 14.4  | 1.57    | 3.65                    | -----                | 1.77                  | 2.33                  | 2.33                  |
| <b>4</b><br>(X = O) | R        | 15.7  | 2.27    | 1.77                    | 2.00                 | -----                 | 2.36                  | 2.37                  |
|                     | TS       | 15.0  | 2.23    | 3.11                    | -----                | 1.43                  | 2.29                  | 2.34                  |
|                     | P        | 14.4  | 2.19    | 3.40                    | -----                | 1.78                  | 2.28                  | 2.28                  |
| <b>5</b><br>(X = N) | R        | 15.0  | 2.31    | 1.86                    | 1.98                 | -----                 | 2.47                  | 2.47                  |
|                     | TS       | 14.0  | 2.63    | 3.23                    | -----                | 1.50                  | 2.34                  | 2.34                  |
|                     | P        | 14.2  | 1.83    | 3.67                    | -----                | 1.77                  | 2.36                  | 2.36                  |

**Figure S1.** Integrated electron density for some ELF basins along the calculated IRC path for the oxidative addition of NH<sub>3</sub> to [(PBP)Ir] fragment (complex **1**, X = B). Bifurcation points separating the SSDs indicated by vertical lines. Basin populations in electrons. Right axis for V(Ir) basin and left axis for the other basins (disynaptic).

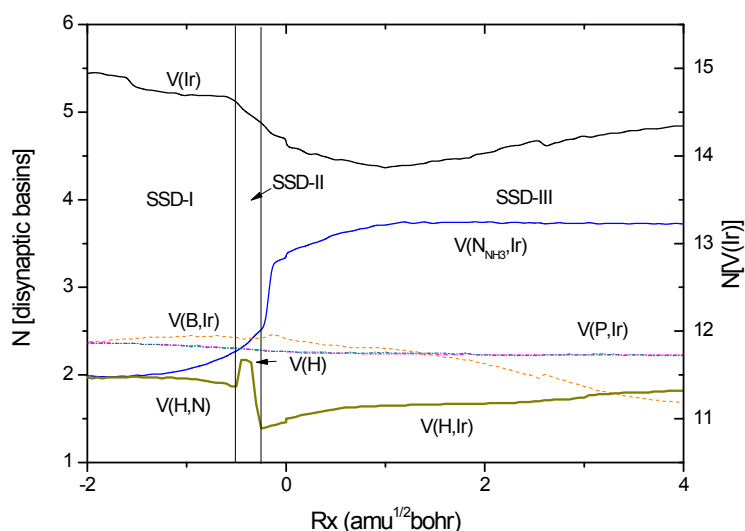

**Table S3.** Reaction coordinates (IRC, amu<sup>1/2</sup>bohr), energy relative to the reactant (B3LYP-D3BJ/def2-SVP, in kcal/mol), some geometrical parameters (in Å) and selected ELF basin populations for the initial and final points of SSDs defined on the reaction path for NH<sub>3</sub> oxidative addition at complex **1** (X = B).

| B        | SDD I |       | SDD II |       | SDD III |       |
|----------|-------|-------|--------|-------|---------|-------|
| Rx       | -4.95 | -0.3  | -0.25  | -0.1  | -0.05   | 4.95  |
| E(DZ)    | 0.2   | 17.6  | 19.5   | 25.3  | 26.8    | -1    |
| dN-H     | 1.022 | 1.33  | 1.444  | 1.548 | 1.601   | 3.518 |
| dIr-H    | 2.878 | 1.694 | 1.659  | 1.63  | 1.618   | 1.645 |
| dIr-N    | 2.389 | 2.186 | 2.186  | 2.185 | 2.184   | 2     |
| dXIr     | 2.021 | 2.055 | 2.056  | 2.058 | 2.059   | 2.091 |
| V(N1,Ir) | 1.97  | 2.27  | 2.31   | 2.47  | 2.51    | 3.73  |
| V(P1,Ir) | 2.38  | 2.31  | 2.3    | 2.29  | 2.28    | 2.22  |
| V(P2,Ir) | 2.36  | 2.3   | 2.3    | 2.28  | 2.28    | 2.22  |
| V(C1,Ir) | 2.38  | 2.43  | 2.41   | 2.42  | 2.42    | 1.61  |
| V(H,N)   | 1.96  | 1.87  |        |       |         |       |
| V(H)     |       |       | 2.17   | 1.67  |         |       |
| V(H,Ir)  |       |       |        |       | 1.39    | 1.85  |
| V(Ir)    | 14.93 | 14.62 | 14.55  | 14.42 | 14.38   | 14.38 |

**Figure S2.** Integrated electron density for some ELF basins along the calculated IRC path for the oxidative addition of NH<sub>3</sub> to [(PNP)Ir] fragment (complex **3**, X = N). Bifurcation points separating the SSDs indicated by vertical lines. Basin populations in electrons. Right axis for V(Ir) basin and left axis for the other basins (disynaptic).

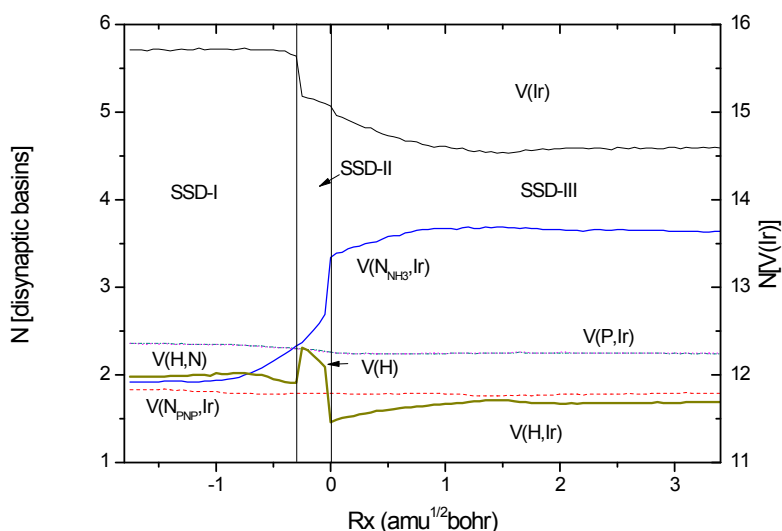

**Table S4.** Reaction coordinates (IRC, amu<sup>1/2</sup>bohr), energy relative to the reactant (B3LYP-D3BJ/def2-SVP, in kcal/mol), some geometrical parameters (in Å) and selected ELF basin populations for the initial and final points of SSDs defined on the reaction path for NH<sub>3</sub> oxidative addition at complex **3** (X = N).

| N        | SDD I |       | SDD II |       | SDD III |       |
|----------|-------|-------|--------|-------|---------|-------|
| Rx       | -1.75 | -0.25 | -0.2   | -0.15 | -0.1    | 3.4   |
| E(DZ)    | 0     | 16.1  | 17     | 18.7  | 19.3    | 6.7   |
| dN-H     | 1.02  | 1.219 | 1.265  | 1.313 | 1.363   | 2.354 |
| dIr-H    | 2.731 | 1.732 | 1.707  | 1.686 | 1.666   | 1.568 |
| dIr-N    | 2.186 | 2.175 | 2.175  | 2.174 | 2.174   | 2.09  |
| dXIr     | 2.071 | 2.049 | 2.049  | 2.049 | 2.049   | 2.046 |
| V(N1,Ir) | 1.83  | 1.79  | 1.79   | 1.79  | 1.79    | 1.79  |
| V(P1,Ir) | 2.36  | 2.3   | 2.3    | 2.29  | 2.28    | 2.24  |
| V(P2,Ir) | 2.36  | 2.3   | 2.29   | 2.28  | 2.27    | 2.25  |
| V(C1,Ir) | 1.92  | 2.33  | 2.37   | 2.51  | 2.59    | 3.64  |
| V(H,N)   | 1.98  | 1.91  |        |       |         |       |
| V(H)     |       |       | 2.31   | 2.22  |         |       |
| V(H,Ir)  |       |       |        |       | 2.16    | 1.69  |
| V(Ir)    | 15.71 | 15.64 | 15.18  | 15.15 | 15.12   | 14.59 |

**Figure S3.** Integrated electron density for some ELF basins along the calculated IRC path for the oxidative addition of NH<sub>3</sub> to [(POP)Ir] fragment (complex **4**, X = O). Bifurcation points separating the SSDs indicated by vertical lines. Basin populations in electrons. Right axis for V(Ir) basin and left axis for the other basins (disynaptic).

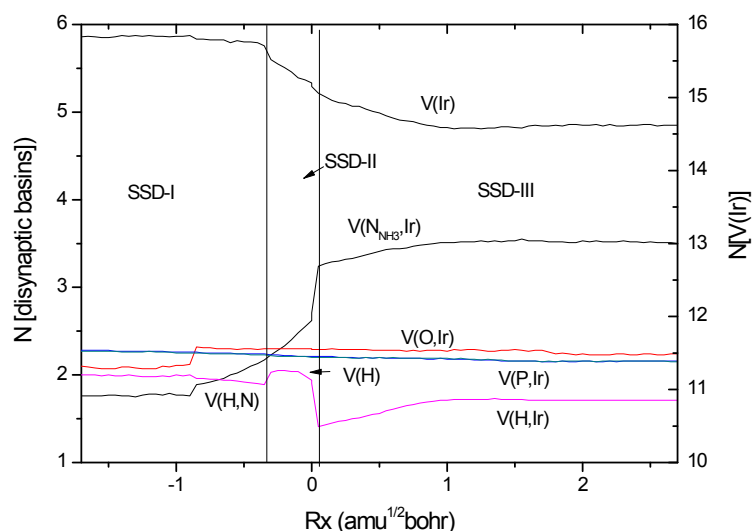

**Table S5.** Reaction coordinates (IRC, amu<sup>1/2</sup>bohr), energy relative to the reactant (B3LYP-D3BJ/def2-SVP, in kcal/mol), some geometrical parameters (in Å) and selected ELF basin populations for the initial and final points of SSDs defined on the reaction path for NH<sub>3</sub> oxidative addition at complex **4** (X = O).

| O        | SDD I |       | SDD II |       | SDD III |       |
|----------|-------|-------|--------|-------|---------|-------|
| Rx       | -1.7  | -0.4  | -0.3   | -0.2  | -0.1    | 2.7   |
| E(DZ)    | 0.0   | 24.6  | 26.3   | 30.4  | 31.1    | 8.0   |
| dN-H     | 1.026 | 1.176 | 1.218  | 1.359 | 1.408   | 3.028 |
| dIr-H    | 2.635 | 1.754 | 1.726  | 1.661 | 1.643   | 1.572 |
| dIr-N    | 2.089 | 2.039 | 2.038  | 2.037 | 2.037   | 1.922 |
| dXIr     | 2.164 | 2.169 | 2.170  | 2.171 | 2.172   | 2.247 |
| V(N1,Ir) | 1.76  | 2.17  | 2.23   | 2.40  | 2.48    | 3.51  |
| V(P1,Ir) | 2.28  | 2.24  | 2.23   | 2.22  | 2.21    | 2.16  |
| V(P2,Ir) | 2.27  | 2.23  | 2.22   | 2.21  | 2.21    | 2.15  |
| V(O,Ir)  | 2.10  | 2.30  | 2.30   | 2.30  | 2.30    | 2.24  |
| V(H,N)   | 2.00  | 1.89  |        |       |         |       |
| V(H)     |       |       | 2.03   | 2.04  |         |       |
| V(H,Ir)  |       |       |        |       | 2.04    | 1.71  |
| V(Ir)    | 15.83 | 15.71 | 15.52  | 15.35 | 15.27   | 14.62 |

**Figure S4.** Integrated electron density for some ELF basins along the calculated IRC path for the oxidative addition of NH<sub>3</sub> to [(PSiHP)Ir] fragment (complex **5**, X = SiH). Bifurcation points separating the SSDs indicated by vertical lines. Basin populations in electrons. Right axis for V(Ir) basin and left axis for the other basins (disynaptic).

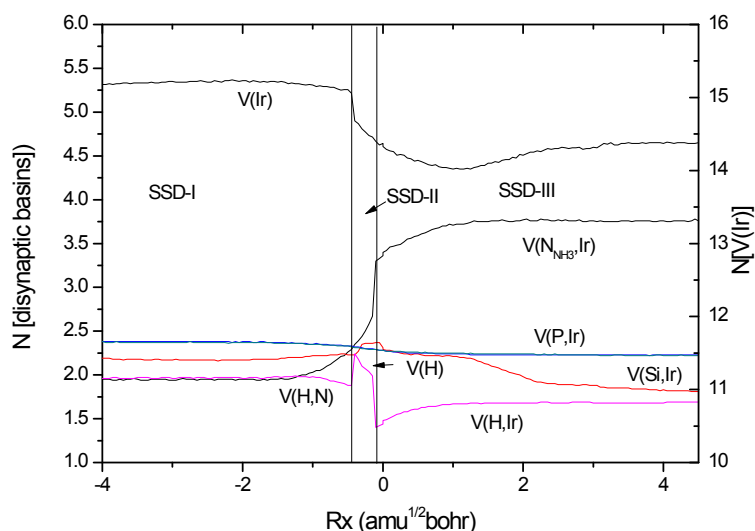

**Table S6.** Reaction coordinates (IRC, amu<sup>1/2</sup>bohr), energy relative to the reactant (B3LYP-D3BJ/def2-SVP, in kcal/mol), some geometrical parameters (in Å) and selected ELF basin populations for the initial and final points of SSDs defined on the reaction path for NH<sub>3</sub> oxidative addition at complex **5** (X = SiH).

| SIH      | SDD I |       | SDD II |       | SDD III |       |
|----------|-------|-------|--------|-------|---------|-------|
| Rx       | -4.0  | -0.5  | -0.4   | -0.3  | -0.3    | 5.0   |
| E(DZ)    | 0.2   | 17.5  | 19.1   | 22.5  | 24.0    | 0.5   |
| dN-H     | 1.022 | 1.148 | 1.191  | 1.288 | 1.339   | 3.391 |
| dIr-H    | 2.821 | 1.780 | 1.752  | 1.705 | 1.686   | 1.598 |
| dIr-N    | 2.313 | 2.176 | 2.175  | 2.173 | 2.173   | 2.008 |
| dXIr     | 2.321 | 2.360 | 2.361  | 2.362 | 2.363   | 2.368 |
| V(N1,Ir) | 1.95  | 2.29  | 2.35   | 2.44  | 2.50    | 3.76  |
| V(P1,Ir) | 2.38  | 2.33  | 2.32   | 2.31  | 2.30    | 2.23  |
| V(P2,Ir) | 2.38  | 2.32  | 2.31   | 2.30  | 2.30    | 2.22  |
| V(Si,Ir) | 2.19  | 2.23  | 2.23   | 2.35  | 2.36    | 1.81  |
| V(H,N)   | 1.96  | 1.88  |        |       |         |       |
| V(H)     |       |       | 2.24   | 2.10  |         |       |
| V(H,Ir)  |       |       |        |       | 2.07    | 1.70  |
| V(Ir)    | 15.18 | 15.06 | 14.68  | 14.57 | 14.53   | 14.39 |

**Figure S5.** Geometrical representation of R (up), TS (middle) and P (down) for complex 1 (X = CH).

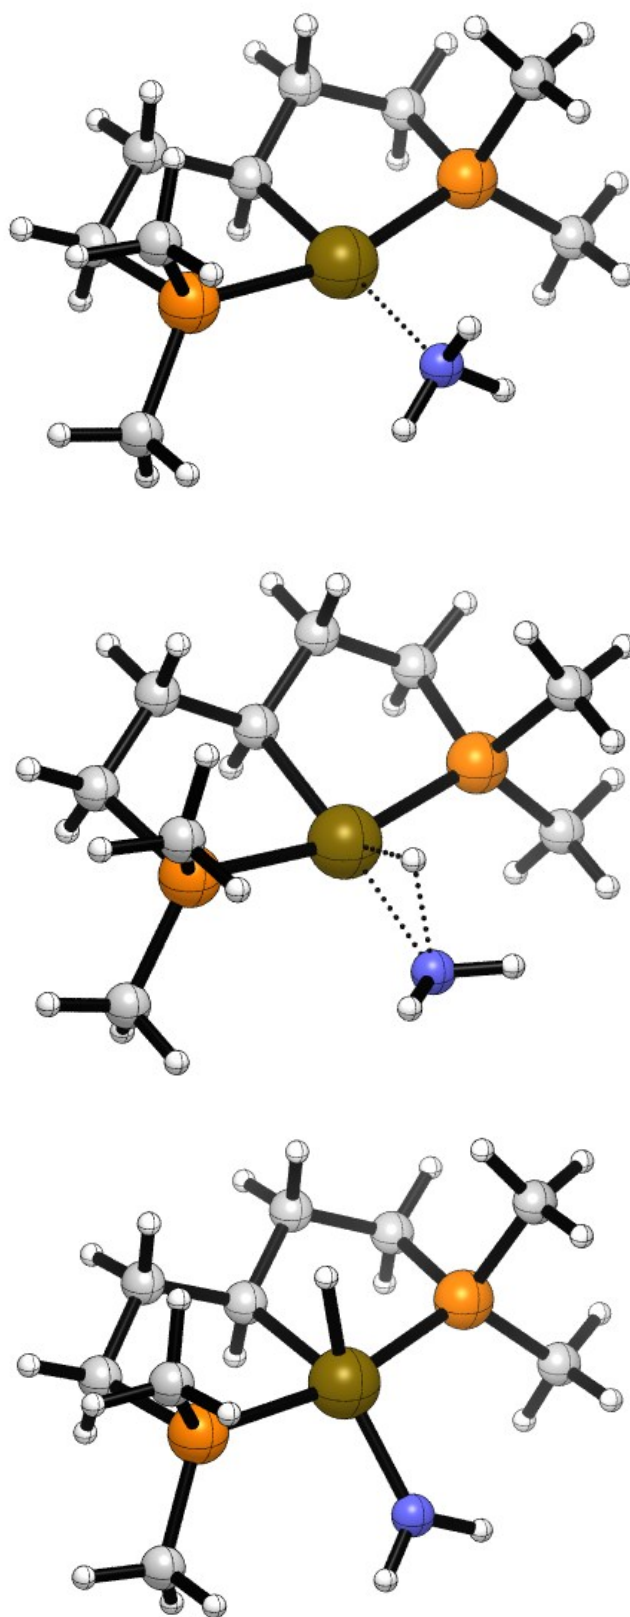



**Table S7.** Cartesian coordinates (Å) of fragment, reactant, transition state and product for different X groups:

**F (X=CH)**

6 0.000007 1.549256 -0.419203  
1 0.000007 1.597959 -1.530839  
6 1.266710 2.259352 0.085799  
1 1.275096 3.310954 -0.259831  
1 1.249511 2.297951 1.189439  
6 -1.266698 2.259346 0.085799  
1 -1.275085 3.310950 -0.259829  
1 -1.249503 2.297943 1.189439  
6 2.530687 1.536285 -0.384391  
1 2.621601 1.603598 -1.481674  
1 3.456068 1.940725 0.057205  
6 -2.530673 1.536283 -0.384396  
1 -3.456056 1.940729 0.057194  
1 -2.621582 1.603593 -1.481680  
15 2.281519 -0.251720 0.034103  
15 -2.281535 -0.251727 0.034097  
77 0.000008 -0.487429 -0.057813  
6 -3.091825 -0.423036 1.685095  
1 -4.152710 -0.125724 1.650323  
1 -3.016154 -1.467013 2.023810  
1 -2.555086 0.207293 2.408301  
6 -3.472733 -1.148166 -1.054276  
1 -3.461352 -2.219936 -0.804093  
1 -4.498688 -0.762342 -0.938681  
1 -3.153489 -1.036773 -2.100573  
6 3.091853 -0.423037 1.685079  
1 3.016067 -1.466982 2.023867  
1 4.152772 -0.125850 1.650250  
1 2.555217 0.207405 2.408264  
6 3.472643 -1.148208 -1.054310  
1 4.498625 -0.762445 -0.938752  
1 3.461207 -2.219979 -0.804130  
1 3.153363 -1.036796 -2.100594

**R (X=CH)**

6 -0.002322 1.717447 -0.411995  
1 -0.001650 1.814704 -1.521717  
6 1.260439 2.441680 0.091371  
1 1.285040 3.496088 -0.248977  
1 1.248431 2.477963 1.196449  
6 -1.266703 2.439956 0.089682  
1 -1.292930 3.494009 -0.251635  
1 -1.255582 2.477244 1.194738  
6 2.522245 1.715035 -0.376323  
1 2.610768 1.777297 -1.474480  
1 3.454691 2.109391 0.061510  
6 -2.526751 1.710419 -0.378216

1 -3.460293 2.103399 0.058517  
1 -2.614519 1.771250 -1.476506  
15 2.255796 -0.069231 0.041117  
15 -2.256540 -0.072712 0.041515  
77 -0.000345 -0.383335 -0.101188  
6 -2.998586 -0.218499 1.730666  
1 -4.054251 0.099426 1.743081  
1 -2.928902 -1.260690 2.077300  
1 -2.417334 0.407693 2.422194  
6 -3.526947 -0.964784 -0.969840  
1 -3.535536 -2.033090 -0.700611  
1 -4.538118 -0.554824 -0.812449  
1 -3.261363 -0.879869 -2.033772  
6 2.997988 -0.215527 1.730211  
1 2.932706 -1.258833 2.074461  
1 4.052400 0.106488 1.743741  
1 2.413971 0.406619 2.423055  
6 3.528739 -0.957197 -0.970762  
1 4.538897 -0.544830 -0.813113  
1 3.539545 -2.025560 -0.701886  
1 3.263171 -0.872232 -2.034717  
1 0.106087 -2.941102 1.004371  
1 -0.842460 -3.055728 -0.333672  
1 0.787702 -3.040074 -0.490480  
7 0.011234 -2.634280 0.033981

**TS (X=CH)**

6 -0.000001 1.733938 -0.370097  
1 0.000013 1.828788 -1.482618  
6 1.269767 2.440532 0.135390  
1 1.303053 3.499592 -0.188859  
1 1.258408 2.459546 1.240391  
6 -1.269782 2.440531 0.135357  
1 -1.303069 3.499586 -0.188908  
1 -1.258443 2.459562 1.240358  
6 2.529529 1.715936 -0.346095  
1 2.620032 1.801928 -1.442652  
1 3.462002 2.102802 0.097196  
6 -2.529531 1.715921 -0.346140  
1 -3.462016 2.102793 0.097123  
1 -2.620011 1.801888 -1.442701  
15 2.278299 -0.080836 0.024055  
15 -2.278298 -0.080841 0.024056  
77 0.000000 -0.381993 -0.092625  
6 -3.039857 -0.313480 1.685851  
1 -4.106608 -0.037938 1.689381  
1 -2.932821 -1.366233 1.988050  
1 -2.495155 0.305989 2.412263

6 -3.467074 -0.965067 -1.072021  
1 -3.431901 -2.042362 -0.850144  
1 -4.498088 -0.599720 -0.938807  
1 -3.159169 -0.824598 -2.118252  
6 3.039869 -0.313523 1.685838  
1 2.932837 -1.366287 1.988006  
1 4.106621 -0.037980 1.689368  
1 2.495173 0.305922 2.412272  
6 3.467067 -0.965030 -1.072056  
1 4.498081 -0.599683 -0.938843  
1 3.431900 -2.042331 -0.850207  
1 3.159151 -0.824535 -2.118281  
1 0.000001 -1.486067 1.081630  
1 -0.812738 -3.054905 0.336220  
1 0.812745 -3.054904 0.336224  
7 0.000004 -2.561543 -0.036276

**P (X=CH)**

6 0.000033 1.639362 -0.611321  
1 0.000066 1.509858 -1.713493  
6 1.274666 2.407822 -0.241755  
1 1.316227 3.383905 -0.763460  
1 1.267132 2.631674 0.839811  
6 -1.274621 2.407832 -0.241832  
1 -1.316176 3.383891 -0.763582  
1 -1.267116 2.631727 0.839726  
6 2.524403 1.590487 -0.588379  
1 2.604861 1.473915 -1.682762  
1 3.461619 2.048201 -0.231257  
6 -2.524332 1.590474 -0.588475  
1 -3.461578 2.048253 -0.231519  
1 -2.604656 1.473781 -1.682858  
15 2.284634 -0.112737 0.102800  
15 -2.284643 -0.112703 0.102834  
77 -0.000003 -0.398142 0.060351  
6 -3.092248 -0.057961 1.754232  
1 -4.158420 0.208009 1.676569  
1 -2.990757 -1.039230 2.240501  
1 -2.568965 0.684530 2.372836  
6 -3.429013 -1.181580 -0.864480  
1 -3.423481 -2.196646 -0.438849  
1 -4.459902 -0.793863 -0.852047  
1 -3.070896 -1.239704 -1.902667  
6 3.092085 -0.058092 1.754285  
1 2.990308 -1.039334 2.240554  
1 4.158321 0.207659 1.676774  
1 2.568845 0.684499 2.372803  
6 3.429146 -1.181514 -0.864466  
1 4.459917 -0.793472 -0.852199  
1 3.423976 -2.196501 -0.438647

1 3.070957 -1.239918 -1.902611  
1 0.000043 0.483605 1.402969  
1 -0.824000 -2.783268 -0.961855  
1 0.823790 -2.783335 -0.961985  
7 -0.000063 -2.235805 -0.723025

**F (X=N)**

6 1.190677 2.216620 0.020674  
1 1.143317 3.243604 -0.391698  
1 1.247677 2.341055 1.129186  
6 -1.190677 2.216620 0.020673  
1 -1.143318 3.243604 -0.391699  
1 -1.247678 2.341055 1.129185  
6 2.455873 1.516727 -0.472648  
1 2.488548 1.540966 -1.573472  
1 3.373914 1.981826 -0.078826  
6 -2.455873 1.516727 -0.472649  
1 -3.373914 1.981826 -0.078828  
1 -2.488547 1.540965 -1.573474  
15 2.285500 -0.253597 0.033203  
15 -2.285500 -0.253597 0.033203  
77 0.000000 -0.489891 -0.038662  
6 -3.125148 -0.324006 1.674394  
1 -4.174476 0.007392 1.610697  
1 -3.089337 -1.354029 2.058759  
1 -2.576637 0.319276 2.377241  
6 -3.469014 -1.168507 -1.043238  
1 -3.485988 -2.229119 -0.749681  
1 -4.488443 -0.757151 -0.965591  
1 -3.123886 -1.104481 -2.085142  
6 3.125149 -0.324007 1.674394  
1 3.089336 -1.354030 2.058760  
1 4.174478 0.007388 1.610695  
1 2.576641 0.319277 2.377240  
6 3.469014 -1.168505 -1.043240  
1 4.488442 -0.757145 -0.965597  
1 3.485992 -2.229117 -0.749680  
1 3.123883 -1.104483 -2.085143  
7 0.000000 1.494404 -0.404604

**R (X=N)**

6 1.187763 2.407128 -0.015080  
1 1.147991 3.416116 -0.479149  
1 1.294263 2.600946 1.084893  
6 -1.187773 2.407130 -0.015100  
1 -1.147998 3.416114 -0.479177  
1 -1.294286 2.600957 1.084871  
6 2.440178 1.678387 -0.502990  
1 2.456382 1.666106 -1.604717  
1 3.372913 2.138682 -0.137252

6 -2.440184 1.678381 -0.503015  
 1 -3.372923 2.138679 -0.137291  
 1 -2.456374 1.666087 -1.604741  
 15 2.260188 -0.076105 0.046713  
 15 -2.260182 -0.076100 0.046716  
 77 -0.000005 -0.395911 -0.069676  
 6 -3.033324 -0.080262 1.725466  
 1 -4.076901 0.274381 1.699033  
 1 -3.004743 -1.097947 2.142902  
 1 -2.439300 0.572410 2.380993  
 6 -3.529055 -0.994924 -0.937247  
 1 -3.575373 -2.043162 -0.601159  
 1 -4.531063 -0.548304 -0.830270  
 1 -3.236078 -0.982368 -1.997225  
 6 3.033313 -0.080282 1.725472  
 1 3.004752 -1.097975 2.142892  
 1 4.076882 0.274384 1.699057  
 1 2.439266 0.572366 2.381003  
 6 3.529096 -0.994877 -0.937255  
 1 4.531091 -0.548237 -0.830242  
 1 3.575429 -2.043127 -0.601207  
 1 3.236140 -0.982286 -1.997238  
 1 0.000342 -2.933423 0.943015  
 1 -0.817982 -2.977414 -0.482621  
 1 0.817716 -2.977376 -0.483178  
 7 0.000015 -2.580017 -0.016654  
 7 -0.000003 1.656953 -0.350645

**TS (X=N)**

6 1.192955 2.405688 -0.000200  
 1 1.146062 3.408387 -0.474094  
 1 1.295541 2.603825 1.096008  
 6 -1.192980 2.405681 -0.000213  
 1 -1.146092 3.408378 -0.474112  
 1 -1.295576 2.603823 1.095993  
 6 2.445899 1.678634 -0.490706  
 1 2.467342 1.678923 -1.592481  
 1 3.376835 2.137826 -0.120276  
 6 -2.445914 1.678612 -0.490724  
 1 -3.376857 2.137799 -0.120306  
 1 -2.467346 1.678892 -1.592499  
 15 2.279419 -0.085485 0.031077  
 15 -2.279420 -0.085499 0.031078  
 77 0.000001 -0.381818 -0.041971  
 6 -3.089923 -0.159309 1.683318  
 1 -4.146301 0.150505 1.636706  
 1 -3.026900 -1.186583 2.072490  
 1 -2.541100 0.499357 2.371349  
 6 -3.457582 -1.017806 -1.032598  
 1 -3.467755 -2.074904 -0.726330

1 -4.479809 -0.612530 -0.963364  
 1 -3.108734 -0.968002 -2.073958  
 6 3.089926 -0.159314 1.683314  
 1 3.026902 -1.186592 2.072474  
 1 4.146306 0.150496 1.636701  
 1 2.541108 0.499345 2.371354  
 6 3.457575 -1.017777 -1.032616  
 1 4.479808 -0.612516 -0.963367  
 1 3.467731 -2.074883 -0.726377  
 1 3.108733 -0.967940 -2.073977  
 1 0.000015 -1.687803 0.964537  
 1 -0.818065 -3.087115 0.136824  
 1 0.818135 -3.087094 0.136913  
 7 0.000045 -2.553102 -0.153101  
 7 -0.000009 1.648347 -0.319504

**P (X=N)**

6 1.188961 2.382991 -0.175541  
 1 1.185951 3.374965 -0.674528  
 1 1.261351 2.602684 0.921770  
 6 -1.188950 2.382990 -0.175506  
 1 -1.185937 3.374976 -0.674470  
 1 -1.261324 2.602657 0.921811  
 6 2.441850 1.614995 -0.606525  
 1 2.458851 1.528766 -1.705058  
 1 3.374712 2.100319 -0.276622  
 6 -2.441848 1.615013 -0.606495  
 1 -3.374704 2.100336 -0.276575  
 1 -2.458858 1.528807 -1.705030  
 15 2.288482 -0.103302 0.057921  
 15 -2.288484 -0.103300 0.057911  
 77 -0.000001 -0.406664 0.049515  
 6 -3.132763 -0.056338 1.689993  
 1 -4.188102 0.244056 1.593200  
 1 -3.073708 -1.048902 2.160295  
 1 -2.603279 0.659904 2.334111  
 6 -3.421324 -1.128395 -0.964741  
 1 -3.448002 -2.153644 -0.565050  
 1 -4.444504 -0.720648 -0.971688  
 1 -3.032477 -1.167848 -1.992411  
 6 3.132762 -0.056302 1.690002  
 1 3.073710 -1.048856 2.160325  
 1 4.188101 0.244093 1.593205  
 1 2.603275 0.659951 2.334106  
 6 3.421317 -1.128421 -0.964710  
 1 4.444500 -0.720681 -0.971660  
 1 3.447985 -2.153664 -0.565003  
 1 3.032473 -1.167890 -1.992380  
 1 -0.000010 0.342671 1.443722  
 1 -0.822594 -2.915720 -0.469048

1 0.822715 -2.915551 -0.469717  
7 -0.000004 -2.316176 -0.476684  
7 0.000000 1.645065 -0.526497

**F (X=B)**

6 1.381333 2.335900 -0.046016  
1 1.300167 3.281691 -0.612201  
1 1.534059 2.644494 1.007997  
6 -1.381335 2.335900 -0.046023  
1 -1.300166 3.281687 -0.612215  
1 -1.534063 2.644502 1.007987  
6 2.583172 1.512220 -0.529408  
1 2.605237 1.485687 -1.631118  
1 3.563917 1.884396 -0.186962  
6 -2.583174 1.512218 -0.529413  
1 -3.563919 1.884394 -0.186967  
1 -2.605239 1.485682 -1.631122  
15 2.288495 -0.230320 0.011108  
15 -2.288494 -0.230321 0.011107  
77 0.000000 -0.467435 -0.037012  
6 -3.093720 -0.317314 1.671388  
1 -4.162121 -0.052047 1.617967  
1 -2.990400 -1.333534 2.080216  
1 -2.576025 0.375901 2.349539  
6 -3.445709 -1.239840 -1.012820  
1 -3.413983 -2.288600 -0.680157  
1 -4.480836 -0.869770 -0.934517  
1 -3.121938 -1.200890 -2.063057  
6 3.093726 -0.317319 1.671385  
1 2.990403 -1.333539 2.080212  
1 4.162127 -0.052056 1.617960  
1 2.576036 0.375898 2.349539  
6 3.445707 -1.239835 -1.012827  
1 4.480833 -0.869760 -0.934533  
1 3.413990 -2.288595 -0.680161  
1 3.121928 -1.200890 -2.063061  
5 -0.000001 1.511174 -0.075242

**R (X=B)**

6 1.367234 2.517461 -0.160838  
1 1.287936 3.427118 -0.784335  
1 1.507867 2.890517 0.874539  
6 -1.367172 2.517475 -0.160801  
1 -1.287883 3.427178 -0.784230  
1 -1.507810 2.890449 0.874605  
6 2.578010 1.673717 -0.579215  
1 2.618311 1.586725 -1.677780  
1 3.557621 2.055708 -0.241580  
6 -2.577950 1.673759 -0.579230  
1 -3.557568 2.055776 -0.241643

1 -2.618197 1.586761 -1.677797  
15 2.260352 -0.036180 0.048179  
15 -2.260349 -0.036138 0.048182  
77 0.000003 -0.363977 -0.047158

6 -2.992394 -0.006324 1.747263  
1 -4.056586 0.280760 1.727700  
1 -2.890993 -0.997575 2.214229  
1 -2.428062 0.714295 2.355785  
6 -3.505216 -1.079297 -0.844171  
1 -3.495473 -2.102676 -0.436052  
1 -4.525283 -0.673005 -0.746856  
1 -3.235970 -1.127277 -1.909839  
6 2.992336 -0.006369 1.747289  
1 2.890960 -0.997629 2.214240  
1 4.056517 0.280755 1.727764  
1 2.427954 0.714221 2.355799  
6 3.505238 -1.079340 -0.844142  
1 4.525332 -0.673152 -0.746669  
1 3.495338 -2.102770 -0.436158  
1 3.236104 -1.127164 -1.909847  
1 0.000840 -3.148007 0.759622  
1 -0.821668 -3.102238 -0.664556  
1 0.820519 -3.102177 -0.666188  
7 -0.000107 -2.742659 -0.178424  
5 0.000028 1.657309 -0.140598

**TS (X=B)**

6 1.372621 2.512468 0.184524  
1 1.314298 3.522961 -0.260280  
1 1.494699 2.686674 1.273379  
6 -1.372525 2.512452 0.184496  
1 -1.314163 3.522917 -0.260378  
1 -1.494562 2.686720 1.273343  
6 2.586314 1.748190 -0.362021  
1 2.633698 1.853398 -1.459087  
1 3.563412 2.068787 0.039889  
6 -2.586286 1.748246 -0.361961  
1 -3.563326 2.068859 0.040074  
1 -2.633798 1.853503 -1.459016  
15 2.285503 -0.050602 -0.051253  
15 -2.285499 -0.050551 -0.051255  
77 -0.000001 -0.371726 -0.101490  
6 -3.090729 -0.368489 1.577160  
1 -4.166454 -0.132224 1.556852  
1 -2.953180 -1.425360 1.851395  
1 -2.593405 0.248284 2.339445  
6 -3.411819 -0.933080 -1.213098  
1 -3.367575 -2.014037 -1.012091  
1 -4.452735 -0.585752 -1.112821  
1 -3.068192 -0.762895 -2.243901

6 3.090700 -0.368487 1.577188  
1 2.952838 -1.425265 1.851619  
1 4.166495 -0.132548 1.556804  
1 2.593583 0.248575 2.339375  
6 3.411828 -0.933166 -1.213063  
1 4.452699 -0.585654 -1.112958  
1 3.367776 -2.014093 -1.011851  
1 3.068064 -0.763223 -2.243860  
1 -0.000127 -1.165446 1.295784  
1 -0.816444 -2.984963 0.724524  
1 0.816158 -2.985049 0.724642  
7 -0.000089 -2.510593 0.335309  
5 0.000057 1.684279 0.014993

**P (X=B)**

6 1.385451 2.426409 -0.434438  
1 1.312008 3.240039 -1.177552  
1 1.560080 2.934059 0.535237  
6 -1.385453 2.426407 -0.434441  
1 -1.312010 3.240037 -1.177556  
1 -1.560084 2.934058 0.535233  
6 2.571853 1.505935 -0.764185  
1 2.570844 1.270091 -1.841424  
1 3.561794 1.928714 -0.521301  
6 -2.571854 1.505933 -0.764188  
1 -3.561795 1.928711 -0.521306  
1 -2.570843 1.270087 -1.841427  
15 2.299938 -0.114604 0.086410  
15 -2.299938 -0.114604 0.086411  
77 0.000000 -0.361241 0.121845  
6 -3.148327 0.060549 1.708946  
1 -4.217751 0.294425 1.585746  
1 -3.038362 -0.872421 2.281078  
1 -2.655637 0.865549 2.272400  
6 -3.378737 -1.307290 -0.805427  
1 -3.333329 -2.285956 -0.304666  
1 -4.424161 -0.962314 -0.833290  
1 -3.009073 -1.425283 -1.834612  
6 3.148327 0.060546 1.708946  
1 3.038366 -0.872426 2.281074  
1 4.217750 0.294426 1.585745  
1 2.655635 0.865542 2.272403  
6 3.378736 -1.307287 -0.805430  
1 4.424162 -0.962316 -0.833287  
1 3.333322 -2.285956 -0.304675  
1 3.009076 -1.425273 -1.834617  
1 -0.000001 0.675628 1.400891  
1 -0.820828 -2.479042 -1.350563  
1 0.820841 -2.479063 -1.350527  
7 0.000000 -2.114665 -0.871367

5 -0.000001 1.627567 -0.271307

**F (X=SiH)**

1 0.000095 2.114161 -1.906487  
6 1.620851 2.380319 0.294739  
1 1.814294 3.422947 -0.010119  
1 1.541229 2.372377 1.395361  
6 -1.620912 2.380344 0.294578  
1 -1.814360 3.422931 -0.010415  
1 -1.541343 2.372539 1.395204  
6 2.758935 1.455252 -0.166111  
1 2.926367 1.573834 -1.250444  
1 3.722450 1.654249 0.335042  
6 -2.758961 1.455210 -0.166224  
1 -3.722490 1.654221 0.334896  
1 -2.926377 1.573711 -1.250569  
15 2.277062 -0.329967 0.081445  
15 -2.277054 -0.329979 0.081460  
77 0.000000 -0.570662 -0.165755  
6 -2.883566 -0.679456 1.791716  
1 -3.960013 -0.463865 1.889646  
1 -2.698701 -1.735133 2.039810  
1 -2.316578 -0.059204 2.500210  
6 -3.527100 -1.228921 -0.940592  
1 -3.432587 -2.311247 -0.765092  
1 -4.554488 -0.912702 -0.697230  
1 -3.325869 -1.034155 -2.004020  
6 2.883605 -0.679565 1.791665  
1 2.698770 -1.735267 2.039675  
1 3.960049 -0.463957 1.889597  
1 2.316614 -0.059384 2.500219  
6 3.527111 -1.228808 -0.940692  
1 4.554496 -0.912584 -0.697321  
1 3.432624 -2.311150 -0.765272  
1 3.325861 -1.033967 -2.004102  
14 0.000002 1.684684 -0.456680

**R (X=SiH)**

1 -0.000899 2.277462 -1.947993  
6 1.621239 2.575434 0.225177  
1 1.824270 3.603676 -0.118321  
1 1.545448 2.609061 1.326361  
6 -1.620854 2.575217 0.226621  
1 -1.823903 3.603834 -0.115749  
1 -1.544570 2.607679 1.327805  
6 2.752723 1.627450 -0.198672  
1 2.924467 1.706956 -1.286341  
1 3.719042 1.827434 0.298244  
6 -2.752606 1.627731 -0.197630  
1 -3.718793 1.827548 0.299605

1 -2.924548 1.707961 -1.285215  
15 2.247748 -0.143991 0.105417  
15 -2.247826 -0.143982 0.105300  
77 -0.000021 -0.472653 -0.185300  
6 -2.781703 -0.403165 1.859015  
1 -3.845068 -0.149518 2.001395  
1 -2.616507 -1.452815 2.145155  
1 -2.161713 0.227617 2.511221  
6 -3.574485 -1.076599 -0.794903  
1 -3.494986 -2.150707 -0.563572  
1 -4.582823 -0.729598 -0.515384  
1 -3.433035 -0.945639 -1.877871  
6 2.781288 -0.401973 1.859412  
1 2.616103 -1.451440 2.146234  
1 3.844613 -0.148176 2.001832  
1 2.161134 0.229211 2.511071  
6 3.574537 -1.077345 -0.793852  
1 4.582848 -0.730262 -0.514337  
1 3.494858 -2.151282 -0.561787  
1 3.433373 -0.947114 -1.876948  
1 0.003823 -3.107663 0.870571  
1 -0.821343 -3.179530 -0.551108  
1 0.819257 -3.178582 -0.556809  
7 0.000307 -2.780044 -0.097051  
14 -0.000087 1.827682 -0.499462

**TS (X=SiH)**

1 0.000060 2.504209 -1.732431  
6 1.633600 2.520593 0.453494  
1 1.843292 3.584487 0.252240  
1 1.568279 2.402330 1.549262  
6 -1.633413 2.520850 0.453734  
1 -1.843085 3.584632 0.251887  
1 -1.567704 2.403238 1.549544  
6 2.757271 1.635807 -0.110166  
1 2.895895 1.844646 -1.185383  
1 3.736480 1.792049 0.375955  
6 -2.757433 1.635909 -0.109026  
1 -3.736097 1.791769 0.378306  
1 -2.897405 1.845184 -1.183976  
15 2.290370 -0.167221 -0.005299  
15 -2.290343 -0.167204 -0.005297  
77 -0.000011 -0.467021 -0.151698  
6 -3.012640 -0.691647 1.608994  
1 -4.099807 -0.518905 1.645808  
1 -2.806218 -1.760166 1.771514  
1 -2.522779 -0.124521 2.413443  
6 -3.425978 -0.971166 -1.214204  
1 -3.323381 -2.063565 -1.132833  
1 -4.476278 -0.687140 -1.040118

1 -3.130819 -0.675125 -2.231439  
6 3.012211 -0.690673 1.609512  
1 2.804517 -1.758761 1.773218  
1 4.099582 -0.519159 1.646070  
1 2.523065 -0.122100 2.413372  
6 3.426497 -0.971770 -1.213355  
1 4.476444 -0.685782 -1.040365  
1 3.325681 -2.064176 -1.129845  
1 3.130325 -0.678135 -2.230989  
1 -0.000123 -1.297292 1.229770  
1 -0.815814 -3.042200 0.707200  
1 0.815933 -3.042102 0.707092  
7 0.000006 -2.591602 0.291543  
14 -0.000024 1.891243 -0.345166

**P (X=SiH)**

1 0.000004 1.909643 -2.122679  
6 1.650500 2.533769 -0.038872  
1 1.865036 3.507331 -0.510202  
1 1.609415 2.696368 1.051657  
6 -1.650504 2.533768 -0.038880  
1 -1.865040 3.507327 -0.510214  
1 -1.609421 2.696372 1.051649  
6 2.756564 1.520087 -0.388103  
1 2.878613 1.465487 -1.483775  
1 3.742341 1.783903 0.033236  
6 -2.756565 1.520082 -0.388109  
1 -3.742343 1.783898 0.033227  
1 -2.878612 1.465479 -1.483782  
15 2.298923 -0.210164 0.145546  
15 -2.298923 -0.210165 0.145547  
77 0.000000 -0.475263 0.039017  
6 -3.018576 -0.348277 1.832757  
1 -4.102165 -0.150245 1.828011  
1 -2.828025 -1.357401 2.226119  
1 -2.511936 0.374529 2.487494  
6 -3.418332 -1.273211 -0.855084  
1 -3.324919 -2.315308 -0.514113  
1 -4.469331 -0.956672 -0.764876  
1 -3.110311 -1.223524 -1.909717  
6 3.018575 -0.348283 1.832755  
1 2.828025 -1.357410 2.226112  
1 4.102165 -0.150251 1.828010  
1 2.511935 0.374519 2.487496  
6 3.418333 -1.273204 -0.855090  
1 4.469332 -0.956666 -0.764880  
1 3.324920 -2.315303 -0.514124  
1 3.110313 -1.223512 -1.909723  
1 -0.000001 0.474279 1.363034  
1 -0.822980 -2.653704 -1.371268

1 0.822998 -2.653753 -1.371183  
7 0.000001 -2.222193 -0.956490  
14 0.000000 1.752983 -0.619216

**F (X=O)**

6 1.217776 2.253775 0.041318  
1 1.113793 3.255592 -0.401479  
1 1.261478 2.348714 1.139043  
6 -1.217778 2.253772 0.041294  
1 -1.113794 3.255584 -0.401513  
1 -1.261496 2.348723 1.139018  
6 2.414226 1.512678 -0.518798  
1 2.399369 1.545619 -1.619081  
1 3.344333 1.991786 -0.175180  
6 -2.414217 1.512664 -0.518830  
1 -3.344330 1.991779 -0.175238  
1 -2.399338 1.545584 -1.619113  
15 2.318470 -0.268745 -0.000433  
15 -2.318477 -0.268751 -0.000434  
77 0.000005 -0.505888 0.039052  
6 -3.250129 -0.356151 1.577047  
1 -4.293048 -0.029547 1.443248  
1 -3.242013 -1.393281 1.944133  
1 -2.757724 0.273393 2.331953  
6 -3.373087 -1.162298 -1.200701  
1 -3.419123 -2.225002 -0.919206  
1 -4.394541 -0.751712 -1.214182  
1 -2.928876 -1.087485 -2.203359  
6 3.250151 -0.356186 1.577028  
1 3.241952 -1.393303 1.944147  
1 4.293094 -0.029674 1.443196  
1 2.757818 0.273426 2.331925  
6 3.373030 -1.162297 -1.200741  
1 4.394498 -0.751746 -1.214237  
1 3.419036 -2.225008 -0.919268  
1 2.928796 -1.087450 -2.203387  
8 0.000003 1.523009 -0.303891

**R (X=O)**

6 1.205970 2.436645 0.119933  
1 1.136852 3.459895 -0.282566  
1 1.260206 2.496280 1.221422  
6 -1.211006 2.435713 0.116699  
1 -1.142629 3.458298 -0.287619  
1 -1.267008 2.497324 1.217993  
6 2.394407 1.696104 -0.462998  
1 2.374196 1.761339 -1.561921  
1 3.334421 2.149587 -0.111304  
6 -2.397515 1.692353 -0.466514  
1 -3.338690 2.144989 -0.116841

1 -2.375971 1.755422 -1.565528  
15 2.293097 -0.104313 -0.009570  
15 -2.293623 -0.106825 -0.009174  
77 -0.000193 -0.416025 -0.015694  
6 -3.199783 -0.221693 1.586949  
1 -4.234039 0.144010 1.491045  
1 -3.221037 -1.269705 1.921637  
1 -2.669578 0.364796 2.350831  
6 -3.430879 -0.924967 -1.197608  
1 -3.520108 -1.993288 -0.947056  
1 -4.435291 -0.474825 -1.166237  
1 -3.019932 -0.838560 -2.213596  
6 3.199706 -0.221578 1.586132  
1 3.221920 -1.270399 1.918387  
1 4.233679 0.145121 1.490985  
1 2.669157 0.362808 2.351399  
6 3.431697 -0.917568 -1.200102  
1 4.434839 -0.464553 -1.169283  
1 3.524011 -1.985856 -0.950580  
1 3.019599 -0.830927 -2.215630  
1 0.097148 -2.789855 1.129150  
1 -0.841876 -2.938676 -0.210824  
1 0.783631 -2.931611 -0.359406  
7 0.008246 -2.498137 0.149535  
8 -0.001762 1.735783 -0.248321

**TS (X=O)**

6 1.211634 2.435196 0.127116  
1 1.156101 3.461499 -0.269190  
1 1.247694 2.483559 1.229479  
6 -1.211633 2.435195 0.127121  
1 -1.156100 3.461499 -0.269183  
1 -1.247690 2.483556 1.229484  
6 2.405145 1.691108 -0.444032  
1 2.401798 1.763858 -1.543099  
1 3.340999 2.143767 -0.080375  
6 -2.405145 1.691109 -0.444027  
1 -3.340998 2.143769 -0.080366  
1 -2.401801 1.763863 -1.543093  
15 2.310494 -0.114807 -0.007866  
15 -2.310495 -0.114806 -0.007867  
77 0.000000 -0.414247 -0.022246  
6 -3.197152 -0.276759 1.587704  
1 -4.244462 0.050953 1.500801  
1 -3.175111 -1.329881 1.906164  
1 -2.683317 0.319800 2.354908  
6 -3.400335 -0.941662 -1.224126  
1 -3.449335 -2.015824 -0.991119  
1 -4.418223 -0.522973 -1.201820  
1 -2.973410 -0.828941 -2.230849

6 3.197151 -0.276754 1.587706  
1 3.175110 -1.329874 1.906169  
1 4.244461 0.050959 1.500802  
1 2.683316 0.319808 2.354907  
6 3.400336 -0.941666 -1.224123  
1 4.418224 -0.522977 -1.201816  
1 3.449336 -2.015828 -0.991111  
1 2.973411 -0.828949 -2.230846  
1 -0.000001 -1.472009 1.196865  
1 -0.833026 -2.976543 0.296010  
1 0.833028 -2.976542 0.296011  
7 0.000001 -2.449273 0.048270  
8 0.000000 1.745625 -0.260970

**P (X=0)**

6 1.211163 2.445323 -0.008679  
1 1.186862 3.455173 -0.449286  
1 1.241754 2.544529 1.091483  
6 -1.211159 2.445325 -0.008686  
1 -1.186858 3.455172 -0.449297  
1 -1.241752 2.544537 1.091475  
6 2.397708 1.653746 -0.535024  
1 2.385534 1.654565 -1.636296  
1 3.338953 2.123859 -0.209252  
6 -2.397704 1.653745 -0.535030  
1 -3.338950 2.123861 -0.209262

1 -2.385528 1.654559 -1.636301  
15 2.317183 -0.122382 0.013141  
15 -2.317183 -0.122381 0.013144  
77 0.000000 -0.441934 0.039644  
6 -3.213047 -0.185055 1.608006  
1 -4.257089 0.144341 1.493786  
1 -3.198644 -1.216751 1.989748  
1 -2.700371 0.454439 2.340596  
6 -3.388216 -1.024153 -1.163384  
1 -3.445117 -2.081247 -0.863442  
1 -4.405314 -0.603537 -1.180546  
1 -2.947548 -0.973503 -2.169247  
6 3.213042 -0.185066 1.608004  
1 3.198635 -1.216763 1.989742  
1 4.257085 0.144328 1.493787  
1 2.700367 0.454428 2.340595  
6 3.388220 -1.024151 -1.163388  
1 4.405318 -0.603533 -1.180550  
1 3.445125 -2.081245 -0.863448  
1 2.947553 -0.973499 -2.169252  
1 0.000004 0.169238 1.489155  
1 -0.824738 -2.910783 -0.010481  
1 0.824643 -2.910815 -0.010137  
7 0.000005 -2.347046 -0.213076  
8 0.000003 1.762510 -0.381223
